# Supplementary material
Source: publisher figshare collection journal article supplement (https://springernature.figshare.com/ndownloader/files/17781722)
Supplement: Supplementary file [file 17781722]

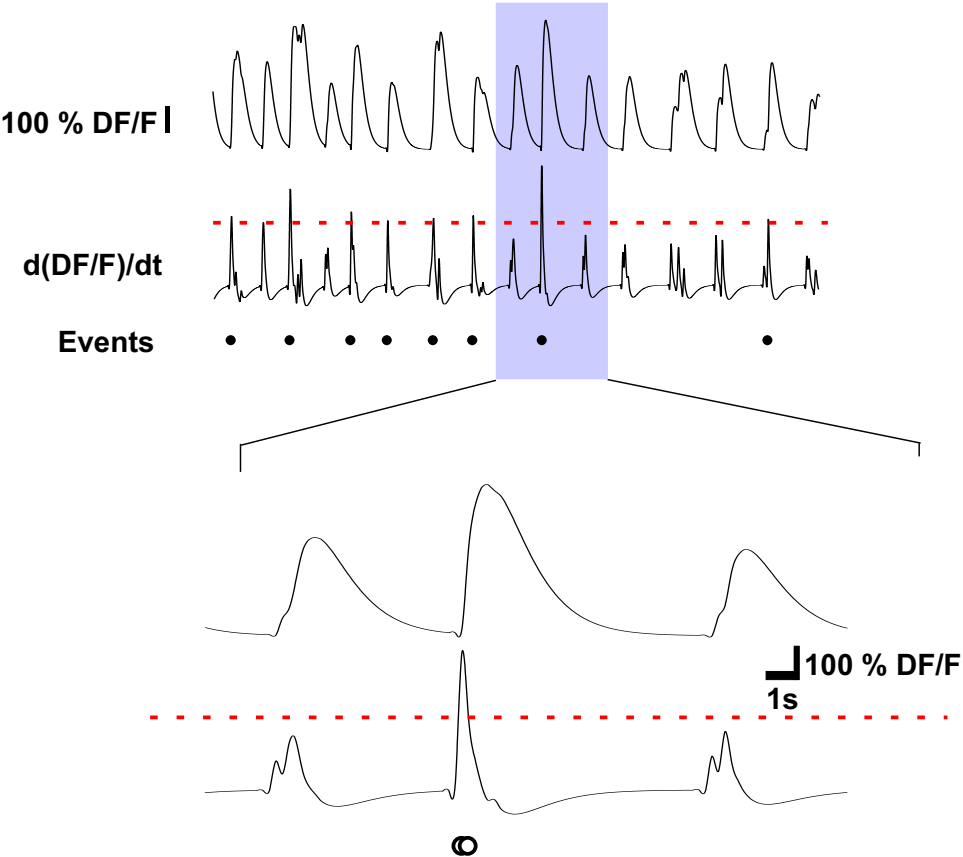

**Figure S1. Identification of individual calcium**

**events.** Representative raw fluorescence data from an example neuron (DF/F) and its time derivative ( $d(DF/F)/dt$ ). Red dashed line indicates the threshold 2.5 times above the SD of the calcium signal. The dots indicate the frames (events) in which  $d(DF/F)/dt$  remained above the threshold (peaks above the threshold). Lower traces are zoomed-in depictions of the shaded area indicated in upper traces.
